# Supplementary material for: Simvastatin Downregulates Cofilin and Stathmin to Inhibit Skeletal Muscle Cells Migration
Source: MDPI journal article supplement (doi:10.3390/ijms23052848), 2022-03-05
Supplement: s1 [file s1]

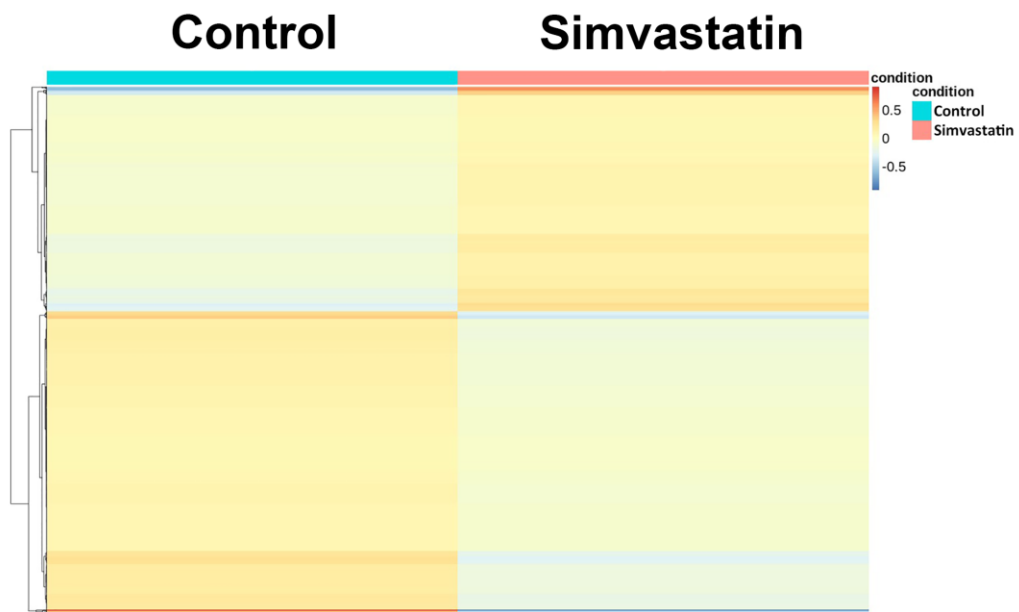

Figure S1. Heatmap of differentially expressed genes (DEGs) in simvastatin-treated skeletal muscle cells.
